# Supplementary material for: DNA Demethylation Induces Tree Peony Flowering with a Low Deformity Rate Compared to Gibberellin by Inducing PsFT Expression under Forcing Culture Conditions
Source: MDPI journal article supplement (doi:10.3390/ijms23126632), 2022-06-14
Supplement: s1 [file s1]

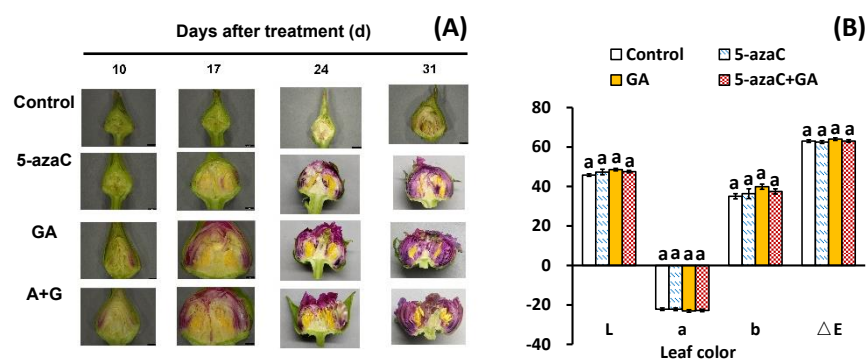

**Figure S1.** Morphological observation by longitudinal cut of buds (A) and statistical analysis of CIE-LAB color in leaves (B) in the four different treatment groups.

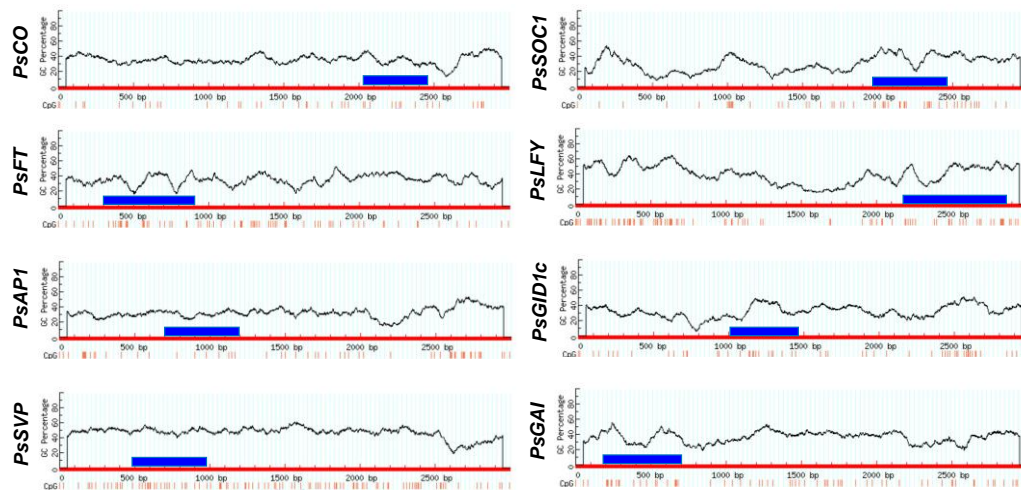

**Figure S2.** The position of CG contents (blue lines) in the promoters of flowering-pathway genes used for DNA methylation determination by McrBC-PCR. The graph is based on MethPrimer (<http://www.urogene.org/methprimer>). A 3 kb of promoter region upon ATG code of each gene was used for analysis and CpG (red vertical short lines) represents the predication of CG-rich sites.

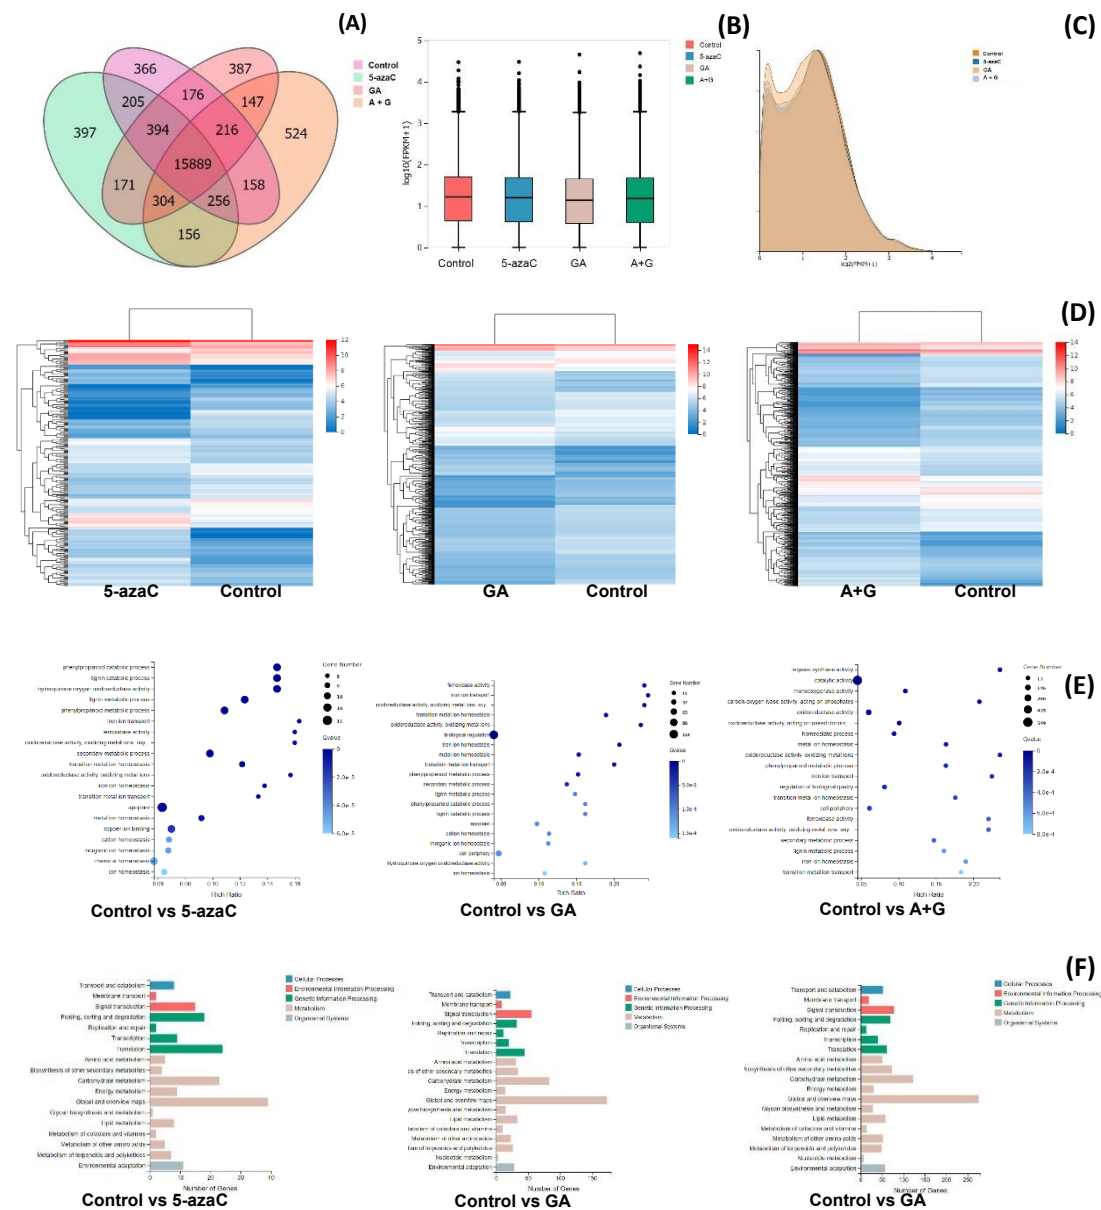

**Figure S3.** Bioinformatics analysis of transcriptome data. (A) Venn diagram of gene number and their distribution in different groups. (B) Box plot comparison of gene expression. (C) Density map of gene expression. X- and Y-axis is log<sub>2</sub> FPKM+1 and gene density, respectively. (D) Cluster heat map of differential gene expression. The horizontal axis represents log<sub>2</sub> FPKM+1 of the sample, and the vertical axis represents genes. (E) Bubble map of DEGs GO enrichment. X-axis represents enrichment ratio, equal to term candidate gene number / term gene number, and Y-axis represents GO Term. The bubble size represents the number of differential genes annotated to a certain GO

Term and the color represents enriched Qvalue. (F) KEGG pathway classification of DEGs. The X-axis represents the number of genes annotated to a KEGG pathway class, and the Y-axis represents the KEGG pathway class.

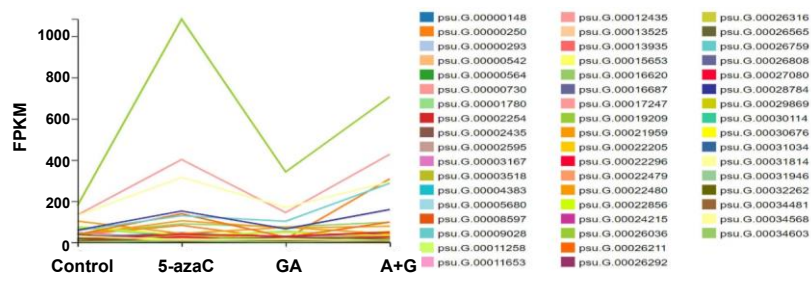

**Figure S4.** Expression pattern of methylation-closer DEGs in four different treatment groups.

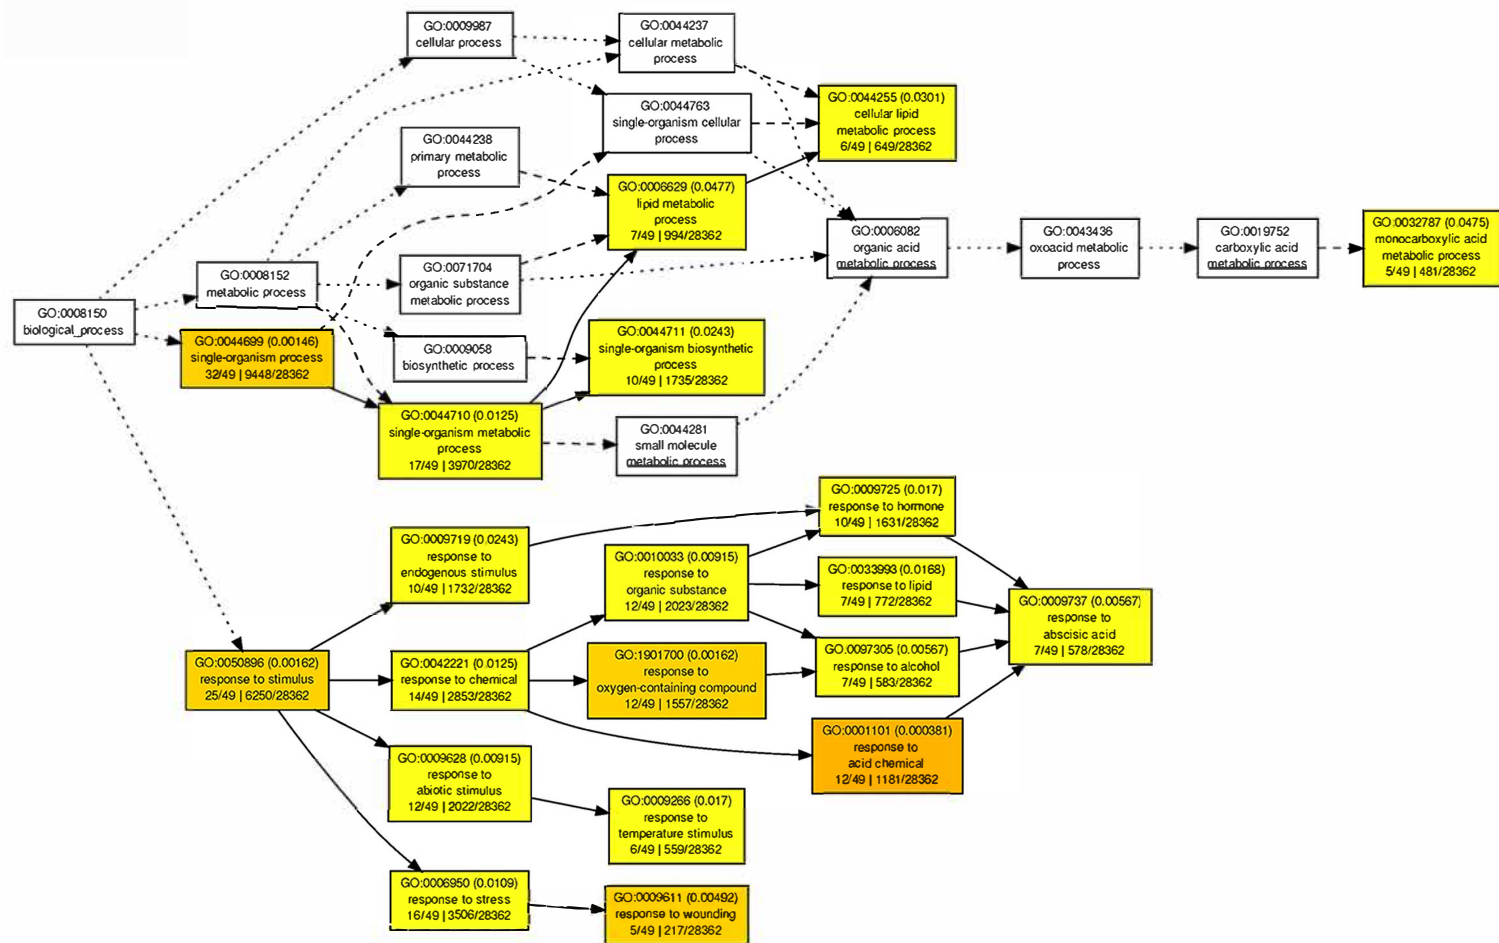

**Figure S5.** GO enrichment path tree of 52 methylation-closer DEGs in biological process compared to Arabidopsis.





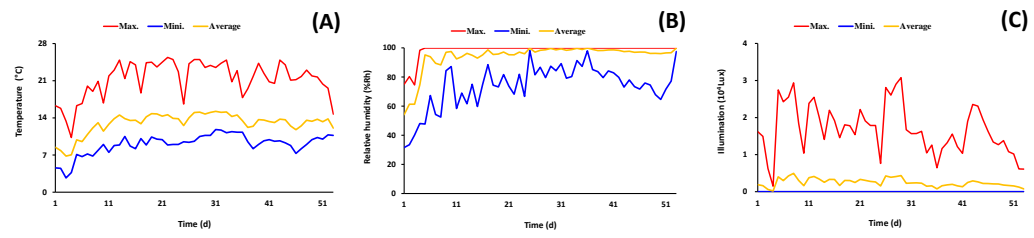

**Figure S7.** The environment conditions in greenhouse during the experiment. (A) Temperature; (B) Relative humidity; (C) Illumination.



**Table S1.** List and information of 52 methylation-closer DEGs

| Gene ID        | Related ID in Arabidopsis | FPKM    |         |        |        |
|----------------|---------------------------|---------|---------|--------|--------|
|                |                           | Control | 5-azaC  | GA     | A+G    |
| psu.G.00000148 | AT2G26690                 | 2.81    | 7.75    | 6.67   | 9.58   |
| psu.G.00000250 | AT5G14780                 | 36.78   | 82.54   | 16.28  | 308.72 |
| psu.G.00000293 | AT5G23960                 | 15.45   | 6.54    | 8.29   | 5.06   |
| psu.G.00000542 | AT5G22390                 | 2.33    | 11.6    | 7.42   | 46.01  |
| psu.G.00000564 | AT3G18660                 | 2.64    | 7.76    | 6.18   | 6.81   |
| psu.G.00000730 | AT3G56290                 | 2.98    | 24.37   | 12.75  | 35.67  |
| psu.G.00001780 | AT1G17840                 | 72.41   | 26.87   | 54.98  | 27.18  |
| psu.G.00002254 | AT1G76860                 | 0.48    | 7.77    | 3.95   | 8.94   |
| psu.G.00002435 | AT5G03160                 | 6.43    | 16.41   | 10.95  | 13.18  |
| psu.G.00002595 | AT5G36110                 | 2.26    | 0.16    | 1.4    | 0      |
| psu.G.00003167 | AT2G21630                 | 47.27   | 17.99   | 21.43  | 16.79  |
| psu.G.00003518 | AT3G07360                 | 17.33   | 41.29   | 18.12  | 36.36  |
| psu.G.00004383 | AT3G45140                 | 4.14    | 8.76    | 5.07   | 18.97  |
| psu.G.00005680 | AT2G37170                 | 2.76    | 9.82    | 5.81   | 10.24  |
| psu.G.00008597 | AT5G08350                 | 0       | 4.75    | 2.43   | 2.87   |
| psu.G.00009028 | AT1G10240                 | 0       | 1.62    | 1.01   | 1.74   |
| psu.G.00011258 | AT4G27290                 | 2.57    | 0.02    | 2.87   | 0      |
| psu.G.00011653 | No Hit Found              | 12.77   | 0       | 15.97  | 0      |
| psu.G.00012435 | No Hit Found              | 1.67    | 32.81   | 12.17  | 27.23  |
| psu.G.00013525 | AT1G50460                 | 8.27    | 17.13   | 8.16   | 20.08  |
| psu.G.00013935 | AT2G46270                 | 6.34    | 21.14   | 16.2   | 29.88  |
| psu.G.00015653 | AT3G22840                 | 12.34   | 42.4    | 23.36  | 55.98  |
| psu.G.00016620 | AT4G17460                 | 41.81   | 90.18   | 75.46  | 98.21  |
| psu.G.00016687 | AT4G00430                 | 22.23   | 46.71   | 27.98  | 44.53  |
| psu.G.00017247 | AT1G26800                 | 133.04  | 402.29  | 145.02 | 427.83 |
| psu.G.00019209 | AT1G52690                 | 178.73  | 1083.55 | 342.19 | 706.36 |
| psu.G.00021959 | AT5G06570                 | 103.12  | 43.28   | 72.77  | 41.99  |
| psu.G.00022205 | AT3G63240                 | 9.01    | 1.11    | 8.45   | 0      |
| psu.G.00022296 | AT5G48050                 | 10.56   | 26.28   | 12.36  | 26.27  |
| psu.G.00022479 | AT4G27290                 | 18.8    | 4.71    | 13.23  | 4.55   |
| psu.G.00022480 | AT4G35350                 | 38.25   | 104.92  | 69.57  | 78.29  |
| psu.G.00022856 | AT1G28370                 | 76.53   | 35.29   | 48.13  | 33.67  |

|                |           |        |        |        |        |
|----------------|-----------|--------|--------|--------|--------|
| psu.G.00024215 | AT1G08550 | 19.09  | 0      | 12.37  | 5.54   |
| psu.G.00026036 | AT1G60470 | 2.48   | 36.08  | 5.31   | 17.49  |
| psu.G.00026211 | AT3G24500 | 38.76  | 139.14 | 25     | 98.34  |
| psu.G.00026292 | AT4G03500 | 17.29  | 8.01   | 12.91  | 0      |
| psu.G.00026316 | AT1G21270 | 10.96  | 2.16   | 7.33   | 0      |
| psu.G.00026565 | AT1G20190 | 37.53  | 11.81  | 25.59  | 17.02  |
| psu.G.00026759 | AT5G14740 | 57.32  | 129.38 | 102.59 | 286.84 |
| psu.G.00026808 | AT3G01090 | 0      | 6.74   | 0      | 7.89   |
| psu.G.00027080 | AT4G36830 | 16.16  | 39.29  | 29.3   | 49.83  |
| psu.G.00028784 | AT1G67090 | 59.71  | 152.05 | 65.98  | 159.76 |
| psu.G.00029869 | AT5G57990 | 3.13   | 0      | 2.5    | 0      |
| psu.G.00030114 | AT1G63490 | 4.52   | 0      | 10.98  | 0.19   |
| psu.G.00030676 | AT3G55580 | 4.89   | 16.21  | 6.29   | 12.65  |
| psu.G.00031034 | AT2G26210 | 7.59   | 1.22   | 2.5    | 1.23   |
| psu.G.00031814 | AT5G20620 | 130.97 | 315.76 | 169.84 | 293.93 |
| psu.G.00031946 | AT5G17860 | 12.45  | 4.83   | 10.02  | 4.95   |
| psu.G.00032262 | AT2G38820 | 17.11  | 3.52   | 8.14   | 4.67   |
| psu.G.00034481 | AT4G20140 | 9.07   | 4.45   | 5.11   | 2.54   |
| psu.G.00034568 | AT5G62680 | 28.91  | 14.43  | 15.24  | 9.57   |
| psu.G.00034603 | AT1G78780 | 0.72   | 8.85   | 1.48   | 11.23  |

---

**Table S2.** List and information of 302 GA-closer DEGs

| Gene ID        | Related ID in Arabidopsis | FPKM    |         |         |         |
|----------------|---------------------------|---------|---------|---------|---------|
|                |                           | Control | 5-azaC  | GA      | A+G     |
| psu.G.00000087 | AT1G67260                 | 8.37    | 4.89    | 1.95    | 2.28    |
| psu.G.00000131 | AT1G27660                 | 42.63   | 35.58   | 17.74   | 18.13   |
| psu.G.00000266 | AT1G62360                 | 7.26    | 15.14   | 1.22    | 0       |
| psu.G.00000272 | AT5G36220                 | 20.29   | 19.15   | 6.31    | 9.12    |
| psu.G.00000282 | AT1G74790                 | 18.74   | 17.11   | 8.91    | 8.39    |
| psu.G.00000384 | AT4G20140                 | 16.23   | 13.29   | 7.36    | 5.13    |
| psu.G.00000754 | AT1G72830                 | 37.95   | 23.27   | 8.36    | 8.58    |
| psu.G.00000782 | AT1G10560                 | 7.88    | 14.16   | 18.05   | 24.2    |
| psu.G.00000919 | AT5G03680                 | 47.47   | 42.82   | 14.66   | 19.64   |
| psu.G.00000921 | AT3G22160                 | 143.43  | 75.33   | 38.86   | 44.75   |
| psu.G.00001145 | AT3G45140                 | 818.82  | 1101.05 | 2419.71 | 2093.8  |
| psu.G.00001416 | AT2G37130                 | 12.3    | 16.52   | 5.22    | 0.98    |
| psu.G.00001427 | AT5G15230                 | 566.2   | 539.39  | 269.8   | 125.72  |
| psu.G.00001456 | AT5G06510                 | 5.83    | 2.48    | 1.33    | 0.89    |
| psu.G.00001457 | AT1G55790                 | 168.99  | 135.28  | 65.64   | 82.26   |
| psu.G.00001668 | AT2G33880                 | 37.09   | 20.71   | 9.42    | 7.73    |
| psu.G.00001719 | AT3G50410                 | 46.96   | 39.66   | 22.99   | 20.88   |
| psu.G.00001736 | AT4G34240                 | 55.99   | 63.86   | 116.67  | 116.56  |
| psu.G.00001953 | AT5G24740                 | 11.81   | 9.56    | 5.22    | 5.82    |
| psu.G.00002324 | AT3G54480                 | 32.56   | 21.59   | 15.01   | 14.16   |
| psu.G.00002512 | AT5G51560                 | 34.97   | 22.34   | 14.03   | 14.47   |
| psu.G.00002587 | AT4G18210                 | 8.15    | 16.47   | 31.41   | 32.51   |
| psu.G.00002646 | AT3G52970                 | 8.76    | 22.82   | 111.65  | 45.19   |
| psu.G.00002749 | AT5G44010                 | 25.29   | 11.11   | 10.1    | 10.99   |
| psu.G.00002758 | AT5G43810                 | 249.6   | 197.41  | 121.97  | 107.89  |
| psu.G.00002959 | AT3G12500                 | 29.05   | 44.37   | 75.79   | 70.31   |
| psu.G.00003012 | AT4G16563                 | 18.03   | 9.44    | 4.59    | 1.69    |
| psu.G.00003047 | AT5G23960                 | 0.2     | 0.97    | 2.91    | 6.64    |
| psu.G.00003065 | AT4G28080                 | 29.73   | 58.27   | 67.85   | 74.84   |
| psu.G.00003356 | AT1G15170                 | 10.9    | 9.66    | 2.8     | 1.07    |
| psu.G.00003413 | AT2G44480                 | 499.78  | 396.4   | 1459.07 | 1049.95 |
| psu.G.00003428 | ATMG00520                 | 3.02    | 6.81    | 7.7     | 10.01   |
| psu.G.00003430 | AT1G31360                 | 10.07   | 8.11    | 4.9     | 3.98    |
| psu.G.00003633 | AT1G11580                 | 455.68  | 628.25  | 1065.83 | 1124.04 |
| psu.G.00003922 | AT3G51630                 | 39.84   | 25.08   | 1.43    | 11.06   |
| psu.G.00004399 | AT2G02148                 | 26.68   | 15.22   | 10.78   | 7.65    |
| psu.G.00004787 | AT3G58120                 | 12.9    | 21.46   | 48.37   | 65.88   |
| psu.G.00004830 | AT2G27830                 | 225.66  | 123.74  | 65.96   | 102.72  |
| psu.G.00004880 | No Hit Found              | 26.56   | 18.04   | 11.96   | 10.35   |

|                |              |        |        |         |         |
|----------------|--------------|--------|--------|---------|---------|
| psu.G.00004892 | AT1G53920    | 2.79   | 6.96   | 13.72   | 21.12   |
| psu.G.00005049 | AT1G55740    | 206.74 | 141.97 | 73.51   | 65.37   |
| psu.G.00005223 | AT1G15460    | 0.93   | 2.16   | 3.94    | 6.22    |
| psu.G.00005237 | AT1G29500    | 4.01   | 3.94   | 32.35   | 27.63   |
| psu.G.00005247 | AT1G22770    | 97.03  | 67.44  | 35.97   | 46.02   |
| psu.G.00005260 | AT1G32860    | 204.12 | 190.7  | 93.75   | 92.78   |
| psu.G.00005290 | AT1G20950    | 19.35  | 7.61   | 4.27    | 3.87    |
| psu.G.00005384 | AT5G02190    | 12.05  | 20.95  | 65.45   | 37.01   |
| psu.G.00005553 | AT4G12730    | 15.81  | 31.39  | 63.2    | 67.28   |
| psu.G.00005603 | AT1G29270    | 29.66  | 25.26  | 9.2     | 1.71    |
| psu.G.00005669 | AT3G50845    | 41.25  | 23.25  | 9.48    | 14.73   |
| psu.G.00005733 | AT1G72210    | 8.68   | 8.35   | 1.32    | 2.78    |
| psu.G.00005769 | No Hit Found | 24.81  | 23.91  | 4.83    | 1.7     |
| psu.G.00006058 | No Hit Found | 424.75 | 624.14 | 3133.72 | 1749.44 |
| psu.G.00006277 | AT2G15730    | 32.63  | 27.17  | 14.18   | 14.51   |
| psu.G.00006280 | AT3G30180    | 24.68  | 27.11  | 7.18    | 8.27    |
| psu.G.00006469 | AT1G22400    | 174.21 | 178.92 | 361.93  | 591.73  |
| psu.G.00006557 | AT5G53900    | 48.92  | 35.25  | 16.53   | 22.74   |
| psu.G.00006629 | AT3G15810    | 129    | 111.97 | 46.01   | 50.69   |
| psu.G.00006702 | AT4G37870    | 484.43 | 451.85 | 129.18  | 100.81  |
| psu.G.00006918 | AT1G21410    | 17.97  | 18.61  | 7.25    | 6.31    |
| psu.G.00007035 | AT3G25830    | 9.05   | 16.86  | 29.36   | 64.14   |
| psu.G.00007228 | AT1G23380    | 12.61  | 11.65  | 3.42    | 2.84    |
| psu.G.00007293 | AT1G29460    | 1.42   | 3      | 15.64   | 21.52   |
| psu.G.00007322 | AT1G64380    | 11.82  | 13.46  | 25.86   | 45.77   |
| psu.G.00007387 | AT5G45910    | 94.92  | 85.96  | 192.77  | 195.99  |
| psu.G.00007389 | AT1G53600    | 7.42   | 4.24   | 2.99    | 2.68    |
| psu.G.00007441 | AT1G13280    | 143.63 | 177    | 431.17  | 401.91  |
| psu.G.00007925 | AT1G78100    | 17.53  | 9.03   | 8.59    | 8.64    |
| psu.G.00007998 | AT3G13080    | 5.06   | 4.6    | 2.18    | 2.47    |
| psu.G.00008023 | AT3G62340    | 16.06  | 6.68   | 3.24    | 3.41    |
| psu.G.00008126 | AT2G45580    | 28.16  | 56.73  | 11.55   | 11.85   |
| psu.G.00008212 | AT3G53980    | 86.91  | 115.37 | 42.81   | 12.11   |
| psu.G.00008253 | AT1G48790    | 25.82  | 23.18  | 10.84   | 10.6    |
| psu.G.00008362 | AT4G11650    | 0      | 1.03   | 5.45    | 13.27   |
| psu.G.00008395 | AT4G18260    | 28.13  | 20.46  | 10.12   | 9.66    |
| psu.G.00008474 | No Hit Found | 76.65  | 68.66  | 21.2    | 0       |
| psu.G.00008482 | AT4G37160    | 1.52   | 2.58   | 5.53    | 6.08    |
| psu.G.00008628 | AT4G27450    | 12.02  | 10.78  | 1.07    | 2.54    |
| psu.G.00008662 | AT3G51060    | 21.84  | 15.41  | 8.22    | 8       |
| psu.G.00008707 | AT1G17100    | 35.13  | 72.31  | 73.98   | 125.01  |
| psu.G.00008987 | AT3G61490    | 0      | 0      | 16.78   | 32.34   |
| psu.G.00009014 | AT1G22360    | 65.51  | 36.87  | 9.83    | 12.82   |
| psu.G.00009129 | AT5G23960    | 0.2    | 0.97   | 2.91    | 6.64    |

|                |              |         |         |         |        |
|----------------|--------------|---------|---------|---------|--------|
| psu.G.00009548 | AT2G31240    | 20.73   | 18.97   | 7.7     | 9.04   |
| psu.G.00009550 | AT1G69560    | 31.84   | 39.81   | 11.98   | 12.82  |
| psu.G.00009627 | AT2G40610    | 40.16   | 63.02   | 167.35  | 457.23 |
| psu.G.00009823 | AT4G31980    | 39.9    | 24.8    | 11.76   | 0.67   |
| psu.G.00009887 | AT2G18630    | 369.99  | 354.8   | 73.35   | 77.32  |
| psu.G.00009935 | AT5G13930    | 87.1    | 124.65  | 382.36  | 728.33 |
| psu.G.00010206 | AT3G16490    | 25.59   | 19.8    | 10.2    | 9.22   |
| psu.G.00010210 | AT2G39540    | 248.91  | 226.74  | 663.45  | 788.24 |
| psu.G.00010216 | AT3G09270    | 728.35  | 447.54  | 291.93  | 45.41  |
| psu.G.00010279 | AT4G31730    | 45.33   | 32.32   | 20.98   | 19.66  |
| psu.G.00010584 | AT2G45850    | 34.9    | 25.77   | 16.65   | 15.71  |
| psu.G.00010645 | AT5G25610    | 180.79  | 199.16  | 481.54  | 743.73 |
| psu.G.00010727 | AT1G69440    | 14.93   | 11.17   | 4.54    | 3.62   |
| psu.G.00011100 | AT2G34460    | 31.16   | 32.46   | 71.35   | 71.82  |
| psu.G.00011112 | AT5G25610    | 233.35  | 234.74  | 574.98  | 760.03 |
| psu.G.00011212 | AT1G61680    | 3.22    | 3.89    | 16      | 17.54  |
| psu.G.00011224 | AT2G20340    | 5.25    | 4.17    | 2.03    | 1.82   |
| psu.G.00011225 | AT2G20340    | 7.83    | 8.39    | 2.8     | 2.68   |
| psu.G.00011739 | AT5G62350    | 135.43  | 182.72  | 321.13  | 304.32 |
| psu.G.00011785 | AT3G22550    | 52.17   | 41.97   | 25.59   | 25.29  |
| psu.G.00011811 | AT2G18630    | 361.73  | 335.67  | 862.08  | 733.2  |
| psu.G.00011886 | AT4G34950    | 30.74   | 49.83   | 62.51   | 136.83 |
| psu.G.00012072 | AT1G59960    | 18.87   | 24.21   | 39.08   | 53.6   |
| psu.G.00012074 | AT1G29930    | 4315.64 | 7126.03 | 9192.03 | 9657.2 |
| psu.G.00012179 | AT3G53980    | 28.04   | 39.44   | 3.82    | 2.42   |
| psu.G.00012370 | No Hit Found | 20.93   | 61.41   | 95.86   | 152.16 |
| psu.G.00012434 | AT5G05960    | 164.44  | 113.93  | 72.61   | 40.38  |
| psu.G.00012568 | AT5G65690    | 132.89  | 111.42  | 46.72   | 39.39  |
| psu.G.00012572 | AT4G37870    | 223.96  | 186.12  | 93.79   | 92.96  |
| psu.G.00012585 | AT4G31950    | 17.25   | 23.76   | 59.19   | 948.39 |
| psu.G.00012593 | AT3G08570    | 69.56   | 54.07   | 31.28   | 32     |
| psu.G.00012870 | AT5G06570    | 7.64    | 7.55    | 1.84    | 0.64   |
| psu.G.00013028 | AT3G55550    | 12.88   | 22.2    | 33.37   | 33.42  |
| psu.G.00013127 | AT1G64910    | 129.45  | 136.46  | 463.83  | 541.11 |
| psu.G.00013384 | AT5G06530    | 142.44  | 174.92  | 346.71  | 371.05 |
| psu.G.00013581 | AT5G13170    | 19.16   | 16.03   | 8.05    | 1.13   |
| psu.G.00013856 | AT5G54510    | 354.31  | 229.14  | 100.69  | 109.77 |
| psu.G.00013860 | AT1G06750    | 97.18   | 75.41   | 48.46   | 18.34  |
| psu.G.00013880 | AT5G10270    | 5.9     | 4       | 2.77    | 2.65   |
| psu.G.00013979 | AT5G66940    | 32.45   | 34.31   | 13.36   | 9.54   |
| psu.G.00014288 | AT2G20340    | 9.15    | 9.04    | 2.76    | 1.47   |
| psu.G.00014323 | AT5G13930    | 5.5     | 6.38    | 13.86   | 14.15  |
| psu.G.00014576 | AT1G51850    | 7.51    | 5.24    | 3.2     | 3.55   |
| psu.G.00014631 | AT1G48410    | 17.12   | 15.63   | 7.24    | 5.6    |

|                |              |        |        |        |        |
|----------------|--------------|--------|--------|--------|--------|
| psu.G.00014775 | AT4G34220    | 134.38 | 135.81 | 45.9   | 38.11  |
| psu.G.00014828 | AT5G42820    | 82     | 49.4   | 39.46  | 33.76  |
| psu.G.00014947 | AT3G19000    | 80.45  | 47.19  | 31.87  | 20.2   |
| psu.G.00015090 | AT5G38280    | 6.45   | 1.8    | 1.23   | 0.43   |
| psu.G.00015158 | AT3G52950    | 128.83 | 99.4   | 57.87  | 62.95  |
| psu.G.00015248 | AT2G24050    | 22.69  | 14.77  | 10.89  | 5.6    |
| psu.G.00015265 | AT2G40116    | 8.35   | 6.9    | 2.17   | 2.49   |
| psu.G.00015569 | AT2G05760    | 8.05   | 5.45   | 2.72   | 3.33   |
| psu.G.00015723 | AT4G00210    | 26.33  | 13.52  | 4.87   | 2.37   |
| psu.G.00015871 | AT2G38110    | 10.63  | 21.11  | 77.07  | 114.92 |
| psu.G.00015965 | AT2G47000    | 3.4    | 2.12   | 1.29   | 0.64   |
| psu.G.00016004 | AT4G23530    | 21.83  | 22.76  | 9.93   | 10.07  |
| psu.G.00016018 | AT5G53950    | 29.32  | 22.15  | 11.07  | 5.72   |
| psu.G.00016158 | AT3G29320    | 166.08 | 165.05 | 72.13  | 81.42  |
| psu.G.00016160 | AT2G41890    | 23.76  | 31.64  | 8.33   | 5.85   |
| psu.G.00016225 | AT1G76130    | 37.61  | 43.86  | 17.59  | 12.85  |
| psu.G.00016256 | AT4G22010    | 61.45  | 103.81 | 165.29 | 123.07 |
| psu.G.00016341 | AT4G08150    | 29.41  | 29.89  | 7.19   | 7.74   |
| psu.G.00016375 | AT3G18640    | 9.93   | 8.03   | 4.49   | 1.2    |
| psu.G.00016434 | AT4G14230    | 58.69  | 33.18  | 26.97  | 25.3   |
| psu.G.00016671 | AT4G14740    | 132.43 | 106.61 | 65.03  | 55.37  |
| psu.G.00016791 | No Hit Found | 15.28  | 8.52   | 3.71   | 4.36   |
| psu.G.00017019 | AT5G02370    | 14.9   | 11.07  | 5.94   | 5.83   |
| psu.G.00017163 | AT4G13350    | 9.49   | 6.54   | 2.87   | 4.6    |
| psu.G.00017387 | AT1G67980    | 53.19  | 54.02  | 165.63 | 231.5  |
| psu.G.00017509 | AT5G59800    | 10.65  | 4.23   | 0.88   | 2.47   |
| psu.G.00017554 | AT5G44160    | 20.06  | 18.44  | 7.34   | 8.98   |
| psu.G.00017792 | AT4G27290    | 7.66   | 7.19   | 3.32   | 2.56   |
| psu.G.00018115 | AT4G03000    | 5.65   | 5.96   | 2.31   | 2.16   |
| psu.G.00018261 | AT4G15920    | 27.75  | 33.24  | 64.26  | 60.8   |
| psu.G.00018368 | AT3G45290    | 7.07   | 9.14   | 23.69  | 30.18  |
| psu.G.00018387 | AT4G24000    | 4.74   | 1.11   | 0.27   | 0.43   |
| psu.G.00018421 | AT1G80490    | 11.56  | 8.27   | 5.78   | 3.24   |
| psu.G.00018511 | AT1G20610    | 19.05  | 14.47  | 8.26   | 7.31   |
| psu.G.00018623 | No Hit Found | 132.65 | 71.9   | 20.47  | 11.79  |
| psu.G.00018665 | AT1G29670    | 28.67  | 14.88  | 78.85  | 105.53 |
| psu.G.00018762 | AT5G01660    | 34.67  | 28.83  | 12.83  | 16.63  |
| psu.G.00018764 | AT1G15740    | 54.44  | 33.85  | 12.95  | 22.6   |
| psu.G.00018907 | AT3G15353    | 64.63  | 91.39  | 21.73  | 29.74  |
| psu.G.00019041 | AT1G14040    | 8.54   | 8.2    | 20.35  | 17.25  |
| psu.G.00019111 | AT5G12250    | 208.2  | 364.84 | 627.65 | 602.87 |
| psu.G.00019116 | AT5G54010    | 71.02  | 77.28  | 246.4  | 323.66 |
| psu.G.00019588 | AT2G26640    | 54.43  | 47.81  | 140.39 | 152.44 |
| psu.G.00019736 | AT5G22920    | 13.71  | 10.72  | 3.06   | 2.58   |

|                |              |         |         |         |         |
|----------------|--------------|---------|---------|---------|---------|
| psu.G.00019935 | AT4G21820    | 15.03   | 11.38   | 7.28    | 5.92    |
| psu.G.00020154 | AT3G62820    | 18.49   | 34.93   | 42.39   | 64.64   |
| psu.G.00020175 | AT1G19715    | 18.76   | 15.18   | 6.52    | 8.21    |
| psu.G.00020275 | AT1G69530    | 1071.49 | 1228.37 | 2751.65 | 3852.96 |
| psu.G.00020283 | AT3G48990    | 73.19   | 110.48  | 173.58  | 151.47  |
| psu.G.00020330 | AT2G16390    | 4.09    | 2.64    | 1.5     | 1.27    |
| psu.G.00020384 | AT5G64200    | 91.69   | 47.04   | 41.31   | 39.74   |
| psu.G.00020460 | AT2G18500    | 23.76   | 15.94   | 8.5     | 3.69    |
| psu.G.00020858 | AT3G28345    | 8.25    | 5.72    | 4.11    | 2.78    |
| psu.G.00020913 | AT1G67830    | 117.6   | 72.12   | 55.49   | 51.12   |
| psu.G.00020934 | AT5G13630    | 82.47   | 156.23  | 176.14  | 241.98  |
| psu.G.00020981 | AT2G26640    | 13.2    | 10.16   | 42.76   | 41.4    |
| psu.G.00021029 | AT4G27450    | 271.05  | 143.52  | 60.08   | 104.45  |
| psu.G.00021080 | No Hit Found | 44.5    | 28.06   | 19.74   | 19.78   |
| psu.G.00021156 | AT4G24970    | 29.16   | 14.52   | 11.9    | 7.21    |
| psu.G.00021373 | AT3G11410    | 22.61   | 33.19   | 54.7    | 104.87  |
| psu.G.00021510 | AT3G49500    | 1.78    | 1.37    | 0.51    | 0.21    |
| psu.G.00021920 | AT1G52940    | 10.57   | 4.5     | 3.83    | 3.45    |
| psu.G.00022168 | AT3G16370    | 360.05  | 305.91  | 1020.38 | 1070.1  |
| psu.G.00022374 | AT2G04780    | 116.48  | 163.2   | 277.87  | 410.25  |
| psu.G.00022451 | AT5G62350    | 2.93    | 10.33   | 14.31   | 19.31   |
| psu.G.00022460 | AT1G76160    | 6.53    | 11.34   | 25.69   | 31.74   |
| psu.G.00022518 | AT2G03090    | 1.77    | 3.01    | 13.42   | 13.52   |
| psu.G.00022585 | AT3G07610    | 19.09   | 18.29   | 9.52    | 8.16    |
| psu.G.00022865 | AT2G20340    | 68.98   | 47.81   | 30.74   | 9.12    |
| psu.G.00022873 | AT5G22120    | 28.03   | 15.02   | 9.51    | 3.33    |
| psu.G.00023079 | AT1G77120    | 14.79   | 7.76    | 5.87    | 2.47    |
| psu.G.00023297 | AT1G43190    | 40.57   | 32.91   | 17.78   | 19.65   |
| psu.G.00023400 | AT4G35590    | 70.47   | 42.61   | 28.45   | 32.72   |
| psu.G.00023481 | No Hit Found | 120.7   | 79.14   | 34.57   | 37.24   |
| psu.G.00023693 | AT1G27210    | 31.75   | 26.63   | 14.92   | 15.31   |
| psu.G.00023853 | AT3G08570    | 69.56   | 54.07   | 31.28   | 32      |
| psu.G.00023874 | AT3G26760    | 12.86   | 21.88   | 28.45   | 31.77   |
| psu.G.00024327 | AT1G29930    | 4125.79 | 6562.41 | 9027.91 | 9155.52 |
| psu.G.00024484 | AT1G47960    | 146.37  | 79.32   | 22.9    | 9.96    |
| psu.G.00024520 | AT4G13710    | 29.77   | 54.37   | 123.81  | 135.67  |
| psu.G.00024557 | AT3G51420    | 46.85   | 26.03   | 17.58   | 22.89   |
| psu.G.00024815 | AT4G34131    | 5.62    | 11.78   | 12.56   | 13.55   |
| psu.G.00025062 | AT3G27550    | 17.3    | 11.15   | 8.06    | 8.59    |
| psu.G.00025185 | AT3G02340    | 30.47   | 13.58   | 13.05   | 8.69    |
| psu.G.00025280 | AT5G45380    | 6.37    | 2.66    | 1.67    | 1.88    |
| psu.G.00025555 | AT1G52340    | 20.65   | 19.25   | 69.36   | 51.92   |
| psu.G.00025670 | AT2G25930    | 32.06   | 20.67   | 11.73   | 14.76   |
| psu.G.00025715 | AT4G24210    | 360.5   | 294.23  | 133.14  | 136.97  |



|                |              |         |         |         |         |
|----------------|--------------|---------|---------|---------|---------|
| psu.G.00026202 | No Hit Found | 84.66   | 144.42  | 428.05  | 723.21  |
| psu.G.00026203 | No Hit Found | 0       | 0.66    | 10.84   | 156.22  |
| psu.G.00026236 | AT1G61680    | 1.43    | 3.04    | 11.5    | 9.62    |
| psu.G.00026413 | AT3G50700    | 8.65    | 7.05    | 2.84    | 3.14    |
| psu.G.00026484 | AT1G62360    | 13.22   | 15.52   | 2.01    | 3.82    |
| psu.G.00026597 | AT3G10950    | 30.37   | 32.32   | 12.75   | 11.41   |
| psu.G.00026877 | AT2G27610    | 7.46    | 4.06    | 2.33    | 3.31    |
| psu.G.00027187 | AT5G27670    | 404.71  | 324.23  | 199.96  | 184.63  |
| psu.G.00027253 | AT3G02100    | 26.12   | 20.92   | 11.78   | 11.06   |
| psu.G.00027279 | AT5G09280    | 5.71    | 7.2     | 20.22   | 21.1    |
| psu.G.00027282 | AT4G00490    | 0       | 0       | 3.89    | 5.26    |
| psu.G.00027382 | AT1G61680    | 1.21    | 4.12    | 9.02    | 9.28    |
| psu.G.00027558 | AT1G75180    | 17.16   | 12.52   | 7.25    | 2.47    |
| psu.G.00027565 | AT3G26310    | 2.79    | 0.46    | 0       | 0       |
| psu.G.00027640 | AT3G26330    | 66.8    | 46.79   | 29.53   | 15.03   |
| psu.G.00027768 | AT4G11650    | 61.07   | 36.21   | 21.19   | 3.21    |
| psu.G.00027887 | AT4G31940    | 2.41    | 3.61    | 8.32    | 114.05  |
| psu.G.00028016 | AT3G08900    | 676.92  | 985.38  | 1622.9  | 1772.52 |
| psu.G.00028138 | AT5G09970    | 33.89   | 29.06   | 12.41   | 2.71    |
| psu.G.00028145 | AT1G10680    | 33.45   | 35.75   | 82.14   | 79.69   |
| psu.G.00028348 | AT3G26560    | 10.52   | 8.55    | 3.5     | 2.97    |
| psu.G.00028366 | AT5G38450    | 12.69   | 19.37   | 4.69    | 1.47    |
| psu.G.00028435 | AT3G56400    | 128.13  | 75.12   | 53.64   | 30.23   |
| psu.G.00028489 | AT1G71695    | 302.3   | 170.02  | 94.44   | 142.89  |
| psu.G.00028571 | AT1G62360    | 25.63   | 25.68   | 8.58    | 9.1     |
| psu.G.00028705 | AT5G44360    | 3.21    | 4.96    | 11.84   | 8.13    |
| psu.G.00028758 | AT5G48940    | 8.76    | 5.1     | 2.76    | 1.92    |
| psu.G.00028867 | AT5G40390    | 4.82    | 7.47    | 11.08   | 21.12   |
| psu.G.00029008 | AT4G13930    | 628.39  | 872.62  | 1451.53 | 1546.69 |
| psu.G.00029042 | AT1G76420    | 18.33   | 12.02   | 6.71    | 1.31    |
| psu.G.00029126 | AT4G22880    | 31.24   | 33.73   | 100.35  | 77.11   |
| psu.G.00029132 | AT3G57520    | 1051.46 | 989.18  | 461.11  | 435.59  |
| psu.G.00029158 | AT5G23960    | 0.17    | 1.28    | 9.81    | 30.51   |
| psu.G.00029205 | AT2G18500    | 23.76   | 15.94   | 8.5     | 3.69    |
| psu.G.00029387 | AT2G24762    | 61.93   | 56.29   | 160.93  | 178.9   |
| psu.G.00029408 | AT2G38820    | 9.02    | 15.7    | 0.86    | 0       |
| psu.G.00029474 | AT4G24750    | 0       | 0       | 9.32    | 14.09   |
| psu.G.00029509 | AT3G01516    | 50.74   | 57.91   | 20.89   | 25.3    |
| psu.G.00029549 | AT3G63010    | 25.89   | 22.8    | 5.88    | 6.79    |
| psu.G.00029682 | AT5G57250    | 6.78    | 4.48    | 2.42    | 2.79    |
| psu.G.00030046 | AT2G32010    | 19.49   | 11.46   | 8.5     | 9.55    |
| psu.G.00030118 | AT5G56040    | 8.84    | 15.24   | 17.8    | 18.52   |
| psu.G.00030270 | AT5G59320    | 3262.24 | 4147.55 | 7015.24 | 7786.08 |
| psu.G.00030414 | AT5G50160    | 2.14    | 3.81    | 5.65    | 5.91    |

|                |              |         |         |         |         |
|----------------|--------------|---------|---------|---------|---------|
| psu.G.00030525 | AT2G21140    | 2794.4  | 3239.45 | 9388.47 | 5988.75 |
| psu.G.00030708 | No Hit Found | 6.02    | 14.39   | 37.29   | 53.99   |
| psu.G.00030733 | AT5G03760    | 4.15    | 8.83    | 28.7    | 29.43   |
| psu.G.00030773 | AT2G45550    | 28.87   | 41.53   | 72.7    | 64.33   |
| psu.G.00030860 | AT5G24530    | 173.83  | 149.23  | 82.71   | 73.14   |
| psu.G.00030929 | AT1G29500    | 11.12   | 19.99   | 49.76   | 56.98   |
| psu.G.00030938 | AT3G14280    | 51.7    | 49.76   | 15.71   | 16.59   |
| psu.G.00031028 | AT4G08950    | 9.09    | 9.95    | 27.11   | 28.26   |
| psu.G.00031291 | AT3G49260    | 23.75   | 37.05   | 92.65   | 133.04  |
| psu.G.00031299 | AT5G06900    | 25.62   | 29.94   | 57.48   | 88.57   |
| psu.G.00031560 | No Hit Found | 5.3     | 2.43    | 0       | 0       |
| psu.G.00031975 | AT2G26340    | 13.31   | 2.14    | 0       | 0       |
| psu.G.00031977 | AT2G40070    | 51.59   | 48.82   | 19.07   | 18.75   |
| psu.G.00032037 | AT5G02030    | 33.58   | 27.43   | 6.19    | 4.75    |
| psu.G.00032094 | AT1G69530    | 466.4   | 639.98  | 1274.93 | 2073.8  |
| psu.G.00032281 | AT5G66600    | 44.85   | 32.6    | 15.19   | 15.72   |
| psu.G.00032598 | No Hit Found | 132.65  | 71.9    | 20.47   | 11.79   |
| psu.G.00032772 | AT1G68640    | 38.74   | 49.91   | 15.17   | 15.25   |
| psu.G.00032783 | AT4G22880    | 78.44   | 66.64   | 232.39  | 163.9   |
| psu.G.00032805 | AT1G01200    | 43.58   | 53.39   | 91.02   | 103.93  |
| psu.G.00032900 | AT1G48130    | 29.2    | 42.46   | 7.7     | 2.82    |
| psu.G.00032932 | AT3G04290    | 435.68  | 369.63  | 880.74  | 1308.86 |
| psu.G.00032949 | AT5G15120    | 18.4    | 27.62   | 4.15    | 3.36    |
| psu.G.00033018 | AT3G18280    | 1172.11 | 1461.66 | 2414.11 | 4413.08 |
| psu.G.00033445 | AT5G58600    | 34.94   | 39.25   | 79.03   | 117.63  |
| psu.G.00033448 | AT5G45380    | 14.47   | 8.72    | 4.71    | 4.57    |
| psu.G.00033600 | AT2G27080    | 53.55   | 67.08   | 107.75  | 113.16  |
| psu.G.00033617 | AT2G26150    | 25.25   | 20.82   | 10.77   | 8.96    |
| psu.G.00033646 | AT1G58340    | 2.95    | 1       | 0.24    | 0.26    |
| psu.G.00033762 | AT5G66400    | 160.13  | 161.56  | 55.33   | 53.55   |
| psu.G.00033918 | AT1G17100    | 35.13   | 72.31   | 73.98   | 125.01  |
| psu.G.00034145 | AT3G44540    | 79.97   | 102.7   | 195.61  | 172.22  |
| psu.G.00034341 | AT5G53420    | 172.15  | 106.37  | 58.56   | 73.6    |
| psu.G.00034433 | AT1G76490    | 46.12   | 30.9    | 21.04   | 17.77   |
| psu.G.00034547 | AT3G59190    | 15.24   | 8.77    | 4.62    | 6.92    |
| psu.G.00034668 | No Hit Found | 53.43   | 39.05   | 23.38   | 14.35   |
| psu.G.00034925 | AT3G08900    | 676.92  | 985.38  | 1622.9  | 1772.52 |
| psu.G.00034940 | AT5G12330    | 65.78   | 49.56   | 21.79   | 23.47   |
| psu.G.00034967 | AT1G21410    | 96.77   | 116.54  | 41.99   | 39.73   |
| psu.G.00035210 | AT2G45220    | 11.46   | 10.37   | 1.92    | 2.4     |
| psu.G.00035252 | AT4G31500    | 27.35   | 16.26   | 11.47   | 8.55    |
| psu.G.00035328 | AT1G02500    | 3.41    | 11.84   | 0       | 0       |
| psu.G.00035439 | AT2G45580    | 260.21  | 290.97  | 113.02  | 90.33   |

**Table S3.** Primers used in this study

| Gene name       | Primer      | Sequence (5'-3')        | Accession No.<br>/ Gene ID |
|-----------------|-------------|-------------------------|----------------------------|
| <b>qRT-PCR</b>  |             |                         |                            |
| <i>PsKS</i>     | qPsKS-F     | TTTGAATCTCCCTTTGCCACC   | MH546117                   |
|                 | qPsKS-R     | TGACCATTTCCCAATCCTGTAA  |                            |
| <i>PsGA20ox</i> | qPsGA20ox-F | TGGGTGGTCTTCAAGTGTTT    | MH546118.1                 |
|                 | qPsGA20ox-R | AGCCCTGTAATGTTTCTGTG    |                            |
| <i>PsGA2ox</i>  | qGA2ox-F    | CTCCAAACCCGACACTAAACA   | MH546119                   |
|                 | qGA2ox-R    | GCCCAATGTTCTTGTTCCCA    |                            |
| <i>PsCO</i>     | qPsCO-F     | CGCTTTCCAGTCACTCCTTTC   | KF113358.1                 |
|                 | qPsCO-R     | GCTTCTTCTTCGGCATCTCC    |                            |
| <i>PsFT</i>     | qPsFT-F     | CCAAGCGACCCAAACCTA      | KF113360.1                 |
|                 | qPsFT-R     | CGCCAACCTGGAGTGTA       |                            |
| <i>PsAP1</i>    | qPsAP1-F    | AGAAGAAGGAAAGGGCAATC    | KF113361.1                 |
|                 | qPsAP1-R    | TTCTCCTCACTTCTGTTGG     |                            |
| <i>PsSVP</i>    | qPsSVP-F    | CGATGTTGAGCAAGGAGGTT    | KC847164.1                 |
|                 | qPsSVP-R    | GCTCTAAATCAGCAGCGACA    |                            |
| <i>PsSOC1</i>   | qPsSOC1-F   | CCAATGTCCGAGCAAGAAAG    | KR779924.1                 |
|                 | qPsSOC1-R   | CCGTGCTTCTCGCATAACAT    |                            |
| <i>PsLFY</i>    | qPsLFY-F    | ATGAGAAGGAAGGAGGGGATG   | psu.G.00032564             |
|                 | qPsLFY-R    | CTTTGGCAATGGTCTGAACT    |                            |
| <i>PsGID1c</i>  | qPsGID1c-F  | TGAAGAACCTCCACCAAG      | MH546122                   |
|                 | qPsGID1c-R  | CCACAAGACGACGACAAA      |                            |
| <i>PsGAI</i>    | qPsGAI-F    | GAGTATGCTGTCCGAGTTCA    | MH550803                   |
|                 | qPsGAI-R    | CAGGAGCAAGGAACGAAT      |                            |
| <i>PsMET</i>    | qPsMET-F    | GCTGCTTTGTACTCCAGGCC    | MH038046                   |
|                 | qPsMET-R    | CTGGTGGCATTCAAGAAGTCG   |                            |
| <i>PsCMT</i>    | qPsCMT-F    | TTGAATCAGGGAGTGGTAATGTG | MH038044                   |
|                 | qPsCMT-R    | TTCTTCGCCGACCCTGTTG     |                            |
| <i>PsDRM</i>    | qPsDRM-F    | GAGTTTAGAGTTCCCAAGCGAG  | MH038045                   |
|                 | qPsDRM-R    | GCTCTCATCCTTTCCGTCATC   |                            |
| <i>SnRK1</i>    | qSnRK1-F    | CGTCGTAAGATAAAGAACAT    | psu.G.00026808             |
|                 | q SnRK1-R   | TTCTGTAAACCTACCCTTT     |                            |
| <i>WAK2</i>     | qWAK2-F     | TGTTGGGTAGTTTCTGGTT     | psu.G.00026316             |
|                 | qWAK2-R     | TCGCTCCCTTCATGTTTCG     |                            |
| <i>5Ptase7</i>  | q5Ptase7-F  | GGTAGGGATATTTCTCACGG    | psu.G.00022205             |
|                 | q5Ptase7-R  | CTGCCCACGCAAGACACT      |                            |
| <i>P450</i>     | qP450-F     | GTCCATTCCACTTGACCTG     | psu.G.00002595             |
|                 | qP450-R     | TCTTCATTATCTTCGCCAC     |                            |
| <i>SBH1</i>     | qSBH1-F     | GGATCAGTTCATGGAGGCT     | psu.G.00000266             |
|                 | qSBH1-R     | TGTCGTCTGCTAGAGGGTC     |                            |

|                           |             |                                                                      |                |
|---------------------------|-------------|----------------------------------------------------------------------|----------------|
| <i>Actin</i>              | qPsActin-F  | GAGAGATTCCGTTGCCCAG                                                  | JN105298       |
|                           | qPsActin-R  | TCCTTGCTCATTCTGTCTGC                                                 |                |
| <b>McrBC-PCR</b>          |             |                                                                      |                |
| <i>PsCO</i>               | McPsCO-F    | CACCTGCCAGAATTAGCG                                                   | KF113358       |
|                           | McPsCO- R   | TTCCAGAAACAACCAAGC                                                   |                |
| <i>PsFT</i>               | McPsFT-F    | GCGGCGGACCTAGATAA                                                    | KF113360       |
|                           | McPsFT-R    | TAGTCAGGGACGCAATCG                                                   |                |
| <i>PsAPI</i>              | McPsAPI-F   | GTTGGAGTAGAATTGTACCTAGC                                              | KF113361       |
|                           | McPsAPI-R   | ATGCTTCAGTCACGAGGA                                                   |                |
| <i>PsSVP</i>              | McPsSVP-F   | CAGAGTTCGTGGCTTCAG                                                   | KC847164       |
|                           | McPsSVP-R   | AGATGACCAGATATGTCCGT                                                 |                |
| <i>PsSOC1</i>             | McPsSOC1-F  | AAACTTTTATCCCTCCCC                                                   | KR779924       |
|                           | McPsSOC1-R  | CCGCACCTTAGCCTTT                                                     |                |
| <i>PsLFY</i>              | McPsLFY-F   | GTCGCTGGACTTTATCGC                                                   | psu.G.00032564 |
|                           | McPsLFY-R   | CAAAACATTCTGCCCCGA                                                   |                |
| <i>PsGID1c</i>            | McPsGID1c-F | AGTTAGGCGGGCATAGG                                                    | MH546122       |
|                           | McPsGID1c-R | CAAAATACCCACTTCACAGC                                                 |                |
| <i>PsGAI</i>              | McPsGAI-F   | TCGCACCTTTAGAATACCC                                                  | MH550803       |
|                           | McPsGAI-R   | CTCGGCTTGGCTCACA                                                     |                |
| <b>MassARRAY Primers*</b> |             |                                                                      |                |
|                           | Mass-F      | <u>aggaagagag</u> AAAGTTAGGGATGGTAA<br>TTTTTGAA                      |                |
|                           | Mass-R      | <u>cagtaatacgactcactatagggagaaggct</u> ATAAC<br>CATTAAACCAAAACACAACC |                |

\*The underlined parts mean mass-R inserts with a T7 promoter tag and 8 bases, and MASS-R adds 10 bases to balance Tm value.
